# Supplementary material
Source: ML conference proceedings conference paper supplement (https://proceedings.neurips.cc/paper_files/paper/2012/hash/801c14f07f9724229175b8ef8b4585a8-Abstract.html)
Supplement: Supplementary file 1 [file 801c14f07f9724229175b8ef8b4585a8-Supplemental.zip]

---

# Approximating Equilibria in Sequential Auctions with Incomplete Information and Multi-Unit Demand

---

**Amy Greenwald and Eric Sodomka**  
Department of Computer Science  
Brown University  
Providence, RI 02912  
{amy, sodomka}@cs.brown.edu

**Jiacui Li**  
Department of Applied Math/Economics  
Brown University  
Providence, RI 02912  
jiacui\_li@alumni.brown.edu

## Errata

There was an error in a step of the proof of Theorem 1. This corrected proof yields the same result.

**Theorem 1.** *Given such a black box, if  $(\pi, T)$  is an  $\alpha$ -optimal  $\delta$ -stable MDP assessment for the sequential auction  $\Gamma$ , then  $\pi$  is a symmetric  $\epsilon$ -Bayes-Nash equilibrium for  $\Gamma$ , where  $\epsilon = 2D(\delta) + \alpha$ .*

*Proof.* Let  $T_\pi = \text{Induced}(\pi)$ , and let  $\pi^*$  be such that  $(\pi^*, T_\pi)$  is an optimal MDP assessment.

$$U(\pi, T_\pi) \geq U(\pi, T) - D(\delta) \tag{1}$$

$$\geq U(\pi^*, T) - (\alpha + D(\delta)) \tag{2}$$

$$\geq U(\pi^*, T_\pi) - (\alpha + 2D(\delta)) \tag{3}$$

Lines 1 and 3 hold because  $(\pi, T)$  is  $\delta$ -stable. Line 2 holds because  $(\pi, T)$  is  $\alpha$ -optimal.
