# Supplementary material
Source: ML conference proceedings conference paper supplement (https://proceedings.neurips.cc/paper_files/paper/2012/hash/801c14f07f9724229175b8ef8b4585a8-Abstract.html)
Supplement: Supplementary file 3 [file 801c14f07f9724229175b8ef8b4585a8-Supplemental.zip]

---

# Approximating Equilibria in Sequential Auctions with Incomplete Information and Multi-Unit Demand: Supplemental Material

---

**Amy Greenwald**  
Department of Computer Science  
Brown University  
Providence, RI 02912  
amy@cs.brown.edu

**Jiacui Li**  
Department of Applied Math/Economics  
Brown University  
Providence, RI 02912  
jiacui.li@brown.edu

**Eric Sodomka**  
Department of Computer Science  
Brown University  
Providence, RI 02912  
sodomka@cs.brown.edu

## 1 Three economics models

This section briefly summarizes the three economic models we implemented in the Experiments section in the paper. All those models involve drawing valuations from a fixed distribution, which we took to be  $Unif[0, 1]$  in experiments. Please refer to the original papers for more information.

- **Weber** [3]:  $n \geq 3$  bidders, each demanding one unit of the good and valuing it at  $\theta_i$ , an independent draw from a bounded distribution.  
Take the perspective of a bidder with valuation  $x$  and rank the valuation of her opponents as  $Y^1 \geq \dots \geq Y^{n-1}$ . Then bidding  $b(x) = E[Y^2 | Y^2 < x]$  in the first round (and bidding truthfully in the second round) constitute a symmetric equilibrium. We denote this equilibrium strategy  $\sigma^W$ .
- **Katzman**[1]:  $n \geq 2$  bidders. Valuation of each is determined by two independent draws from a twice differentiable, atomless, bounded distribution. Each bidder ranks her two draws into the higher one  $H_i$  and the lower one  $L_i$ , each representing her valuation for the first and the second good obtained.  
Take the perspective of bidder 1 who has valuation  $(H_1, L_1)$ , and define  $Y^2$  as the second highest among all opponent valuations  $\{H_2, L_2, \dots, H_n, L_n\}$ . Then bidding  $b(H_1) = E[Y^2 | Y^2 < H_1]$ <sup>1</sup> (and bidding truthfully in the second round) constitute a symmetric equilibrium. We denote this equilibrium strategy  $\sigma^K$ .
- **Menezes** [2]:  $n \geq 2$  bidders, each drawing her type  $x$  from a bounded distribution. The bidder then values one good at  $x$  and two goods at  $\delta(x)$ , where  $\delta(\cdot)$  is a publicly known, strictly increasing function. Note that  $\delta(x) - x$  is the bidders' marginal value for the second good, and the two goods have positive synergy (complements) if  $\delta(x) > 2x$  and negative synergy (substitutes) if  $\delta(x) < 2x^2$ .

---

<sup>1</sup>We express the same function differently from the authors' initial form to illustrate the similarity, in our mind, to Weber's result.

<sup>2</sup>In simulations, we take  $\delta(x) - x = x^2 \leq x$  for negative synergy cases and  $\delta(x) - x = \sqrt{x} \geq x$  for positive synergy cases.

Take the perspective of a bidder with type  $x$  and rank opponent types into  $Y^1 \geq \dots \geq Y^{N-1}$ . Then bidding as follows in the first round (and truthfully in the second round) characterize a symmetric equilibrium:

- $b(x) = \delta(x) - x$  if  $n = 2$
- $b(x) = E[\max(\delta(x) - x, Y^2) | Y^2 < x]^3$  if  $n > 2$

We call this strategy profile  $\sigma^M$ .

We also extended the Menezes model to three rounds in the Experiment section simply by adding adding an extra function  $\delta_2(x)$  for the valuation of 3 goods. Thus the marginal value of the third good will be  $\delta_2(x) - \delta(x)$ .

## 2 Derivation: Menezes equilibrium $\sigma^M$ unstable

In the Menezes model, we derive the set of best responses for the case of  $n > 3$  and decreasing marginal values ( $\delta(x) < 2x$ ); the case for  $n = 2$  and increasing marginal values can be derived analogously. We show that a bidder with valuation  $x$  maximize her utility when pretending to be any type within  $[\delta(x) - x, x]$ .

Take the perspective of a bidder with valuation  $x$  and rank opponent valuations into order statistics  $Y_1 \geq \dots \geq Y_{n-1}$ . We will use succinct notation for their cdfs and pdfs:

- cdfs  $F_1(y_1) \doteq P(Y_1 < y_1)$ ,  $F_2(y_2) \doteq P(Y_2 < y_2)$ ,  $F_{1,2}(y_1, y_2) = P(Y_1 < y_1, Y_2 < y_2)$
- pdfs  $f_1(y_1) \doteq dF_1(y_1)/dy_1$ ,  $f_2(y_2) \doteq dF_2(y_2)/dy_2$
- joint pdf  $\bar{f}_1(y_1)\bar{f}_2(y_2) = dF_{1,2}(y_1, y_2)/dy_1 dy_2$ . (Note that  $\bar{f}_1(y_1) \neq f_1(y_1)$ )

Valuation cdf  $F$  is bounded, so we assume  $F(0) = 0$  and  $F(1) = 1$  without loss of generality. Let's denote  $a \vee b \doteq \max(a, b)$  and  $a^+ \doteq \max(a, 0)$  for all  $a, b \in \mathbb{R}$ . Finally we write  $\delta'(x) \doteq \delta(x) - x$ . Suppose the bidder pretends to be type  $w$ , then the corresponding profit is:

$$h(w) = E[(x - \delta'(Y_1)) \vee Y_2]^+ | Y_1 > w] + E[x - b(Y_1) | Y_1 > w] + E[(\delta'(x) - Y_1)^+ | Y_1 < w] \quad (1)$$

$$= E[(x - \delta'(Y_1) \vee Y_2)^+ | Y_1 > w] + E[x - E[\delta'(Y_1) \vee Y_2^* | Y_2^* < Y_1] | Y_1 > w] + E[(\delta'(x) - Y_1)^+ | Y_1 < w] \quad (2)$$

$$= E[(x - (\delta'(Y_1) - Y_1) \vee Y_2)^+ | Y_1 > w] + E[x - \delta'(Y_1) \vee Y_2^* | Y_1 > w] + E[(\delta'(x) - Y_1)^+ | Y_1 < w] \quad (3)$$

$$= E[(x - \delta'(Y_1) \vee Y_2)^+ | Y_1 > w] + E[x - \delta'(Y_1) \vee Y_2 | Y_1 > w] + E[(\delta'(x) - Y_1)^+ | Y_1 < w] \quad (4)$$

$$= \int_w^1 \int_0^{y_1} [x - \delta'(y_1) \vee y_2]^+ \bar{f}_1(y_1) \bar{f}_2(y_2) dy_2 dy_1 \quad (5)$$

$$+ \int_0^w \int_0^{y_1} [x - \delta'(y_1) \vee y_2] \bar{f}_1(y_1) \bar{f}_2(y_2) dy_2 dy_1 + \int_0^w [\delta'(x) - y_1]^+ f_1(y_1) dy_1 \quad (6)$$

Differentiating with respect to  $w$ :

$$h'(w) = - \int_0^w [x - \delta'(w) \vee y_2]^+ \bar{f}_1(w) \bar{f}_2(y_2) dy_2 + \int_0^w [x - \delta'(w) \vee y_2] \bar{f}_1(w) \bar{f}_2(y_2) dy_2 \\ + [\delta'(x) - w]^+ f_1(w) \quad (7)$$

$$= \underbrace{\int_0^w \{ -[x - \delta'(w) \vee y_2]^+ + [x - \delta'(w) \vee y_2] \} \bar{f}_1(w) \bar{f}_2(y_2) dy_2}_A + \underbrace{[\delta'(x) - w]^+ f_1(w)}_B \quad (8)$$

All densities are positive by assumption, so it suffices to look at other parts. Two observations about (9):

<sup>3</sup>We changed the notation a bit to show relationship with Weber's result.

- Term  $A \leq 0$ , and  $A = 0$  when  $w \in [0, x]$ . That can be seen in the integrand. Since  $w < x \Rightarrow \delta'(w) < x$  and  $y_2 < w < x$ , so  $-[x - \delta'(w) \vee y_2] + [x - \delta'(w) \vee y_2] = -[x - \delta'(w) \vee y_2] + [x - \delta'(w) \vee y_2] = 0$ .
- Term  $B \geq 0$  and  $= 0$  when  $w \in [\delta'(x), 1]$ .
- If  $w < \delta'(x)$ ,  $h'(w) > 0$ , so the bidder will want to increase  $w$ .
- if  $w \in [\delta'(x), x] = [\delta(x) - x, x]$ ,  $h'(w) = 0$ , which means that the agent is indifferent.
- If  $w > x$ ,  $h'(w) < 0$ , so the bidder will want to decrease  $w$ .

## References

- [1] B. Katzman. A Two Stage Sequential Auction with Multi-Unit Demands,. *Journal of Economic Theory*, 86(1):77–99, May 1999.
- [2] F. M. Menezes and P. K. Monteiro. Synergies and Price Trends in Sequential Auctions. *Review of Economic Design*, 8:85–98, 2003.
- [3] R. J. Weber. Multiple-Object Auctions. In R. Engelbrecht-Wiggans, R. M. Stark, and M. Shubik, editors, *Competitive Bidding, Auctions, and Procurement*, pages 165–191. New York University Press, 1983.
