# Supplementary material
Source: ML conference proceedings conference paper supplement (https://proceedings.neurips.cc/paper_files/paper/2012/hash/801c14f07f9724229175b8ef8b4585a8-Abstract.html)
Supplement: Supplementary file 4 [file 801c14f07f9724229175b8ef8b4585a8-Supplemental.zip]

Archive with 6 entries (3 files):
- extra/
- extra/errata.pdf
- extra/Paper 1137/supplemental.pdf
- __MACOSX/
- __MACOSX/extra/
- __MACOSX/extra/._Paper 1137/supplemental.pdf
